1 **A causality-inspired feature selection method for cancer imbalanced high-dimensional**  
2 **data**

3 Yijun Liu<sup>1</sup>, Qiang Huang<sup>1,2</sup>, Huiyan Sun<sup>1,2,\*</sup>, Yi Chang<sup>1,2,\*</sup>

4 <sup>1</sup> School of Artificial Intelligence, Jilin University, Changchun, Jilin, China

5 <sup>2</sup> International Center of Future Science, Jilin University, Changchun, Jilin, China

6 \* Corresponding author.

7 E-mail: [huiyansun@jlu.edu.cn](mailto:huiyansun@jlu.edu.cn) (HS), [yichang@jlu.edu.cn](mailto:yichang@jlu.edu.cn) (YC)

8 **Abstract**

9 It is significant but challenging to explore a subset of robust biomarkers to distinguish cancer from normal  
10 samples on high-dimensional imbalanced cancer biological omics data. Although many feature selection  
11 methods addressing high dimensionality and class imbalance have been proposed, they rarely pay attention  
12 to the fact that most classes will dominate the final decision-making when the dataset is imbalanced,  
13 leading to instability when it expands downstream tasks. Because of causality invariance, causal  
14 relationship inference is considered an effective way to improve machine learning performance and  
15 stability. This paper proposes a Causality-inspired Least Angle Nonlinear Distributed (CLAND) feature  
16 selection method, consisting of two branches with a class-wised branch and a sample-wised branch  
17 representing two deconfounder strategies, respectively. We compared the performance of CLAND with  
18 other advanced feature selection methods in transcriptional data of six cancer types with different  
19 imbalance ratios. The genes selected by CLAND have superior accuracy, stability, and generalization in  
20 the downstream classification tasks, indicating potential causality for identifying cancer samples.

21 Furthermore, these genes have also been demonstrated to play an essential role in cancer initiation and  
22 progression through reviewing the literature.

23 Keywords: invariance principles of causality, feature selection, imbalanced data, de-confounder

## 24 **Author Summary**

25 Selecting trustworthy biomarkers from high-dimensional data is an important step to help researchers and  
26 clinicians understand which genes play key roles in cancer development and progression. A large number  
27 of machine learning-based feature selection algorithms have been generated in recent years for biomarker  
28 discovery. However, these methods usually show unstable results in the face of class-imbalanced  
29 biological data, making it seem unreliable for researchers. Here we introduce the causal theory with the  
30 property of causal invariance to aid in the design of feature selection algorithms, analyze how imbalanced  
31 distributions affect feature selection methods, and propose a novel causality-based feature selection  
32 method. The method with bilateral structure adjusts the data distribution from both class-wise and  
33 sample-wise to eliminate the effect of imbalance on the results. Additionally, CLAND can simultaneously  
34 address the nonlinearity and high-dimensionality of cancer data, which broaden its application scope. We  
35 conducted extensive experiments on six real imbalance cancer datasets and obtained efficient and stable  
36 results, while the obtained biomarker has significant biological significance.

## 37 **1 Introduction**

38 Identifying biomarkers with distinguishing ability is a critical step towards cancer diagnosis and prognosis  
39 prediction and helps further understand the mechanism of cancer initiation and various phenotypes. Over  
40 the years, many computational feature selection methods have been proposed to identify critical  
41 biomarkers for cancer and cancer subtypes from the data generated by high-throughput technologies [1].

42 However, as real data are usually imbalanced for each class, such as a large number of cancer samples  
43 versus very few normal samples, the selected features are highly partial to large class [2], and such a subset  
44 of features is often worthless even if it can achieve high classification accuracy. In addition, most existing  
45 feature selection methods have poor robustness and stability when the sample sizes are imbalanced. For the  
46 same dataset, features selected by various methods are usually very different. Furthermore, when  
47 combining selected features with downstream classification or clustering methods, their performances  
48 always vary greatly. The instability raises serious doubts about the reliability of the selected genes as  
49 candidate biomarkers [3].

50 Conventionally, this issue is attributed to the improper assumption of relatively balanced distribution  
51 among different classes, and researchers have put forward a series of methods to address it. The  
52 sampling-based method is one of the simplest and most effective types. They use the known dataset  
53 distribution to re-balance the data distribution, including undersampling for majority class and  
54 oversampling for minority, thereby strengthening the learning of the minority [4]. Nevertheless, this  
55 method destroys the original data distribution, leading to over-fitting to the minority class or under-fitting  
56 to the majority. Another popular type is the cost-sensitive learning method based on heuristic strategies.  
57 They add some constraints to weight conditions based on the original standard loss function so that the  
58 calculation of the final loss is partial to a specific direction to reduce the bias to the majority class.  
59 However, such methods usually require appropriate prior knowledge to establish a corresponding cost  
60 matrix [5].

61 However, regarding the poor performance of traditional feature selection methods for imbalanced data, we  
62 suggest the fundamental reason is that the features are obtained by the association with sample labels but  
63 not the stable causal relationship. Unlike the association, causality is invariable and can always be

64 identified no matter the data distribution. It has been widely used in economics [6] and epidemiology[7]  
65 for many years. Moreover, the introduction of causal mechanisms in the machine learning methods has  
66 been demonstrated to enhance their performance, stability, and interpretability [8-10]. Hence, causal  
67 inference has attracted more and more attention and has been applied in many scenarios, including image  
68 classification and recognition, reinforcement learning and transfer learning. The biggest challenge for  
69 causal inferences from observed data is to remove confounders, which are the common causes of the  
70 treatment variable and outcome. Assuming imbalanced distribution as the main confounder of selected  
71 features and sample labels prediction to identify cancer genes through re-examining and solving the  
72 problems of imbalanced transcriptomic data, we propose a novel feature selection method based on causal  
73 invariance called Causality-inspired Least Angle Nonlinear Distributed (CLAND).

74 We design a two-branch structure representing two deconfounder strategies respectively to remove the  
75 influence of imbalanced data distribution for feature selection. This structure can prevent the overfitting of  
76 the minority class without losing data information. Combining with Hilbert–Schmidt Independence  
77 Criterion Lasso, CLAND can simultaneously address other issues of biological cancer data, such as the  
78 extremely high-dimensional and non-linear association between features and sample labels. When applying  
79 CLAND into several sets of imbalanced cancer transcriptomic data, the selected features can distinguish  
80 between cancer and normal samples well and outperform state-of-the-art methods on efficiency and  
81 stability. Additionally, several biomarkers obtained by our method have considerable biological  
82 significance and have been widely recognized in clinical trials and cancer treatment.

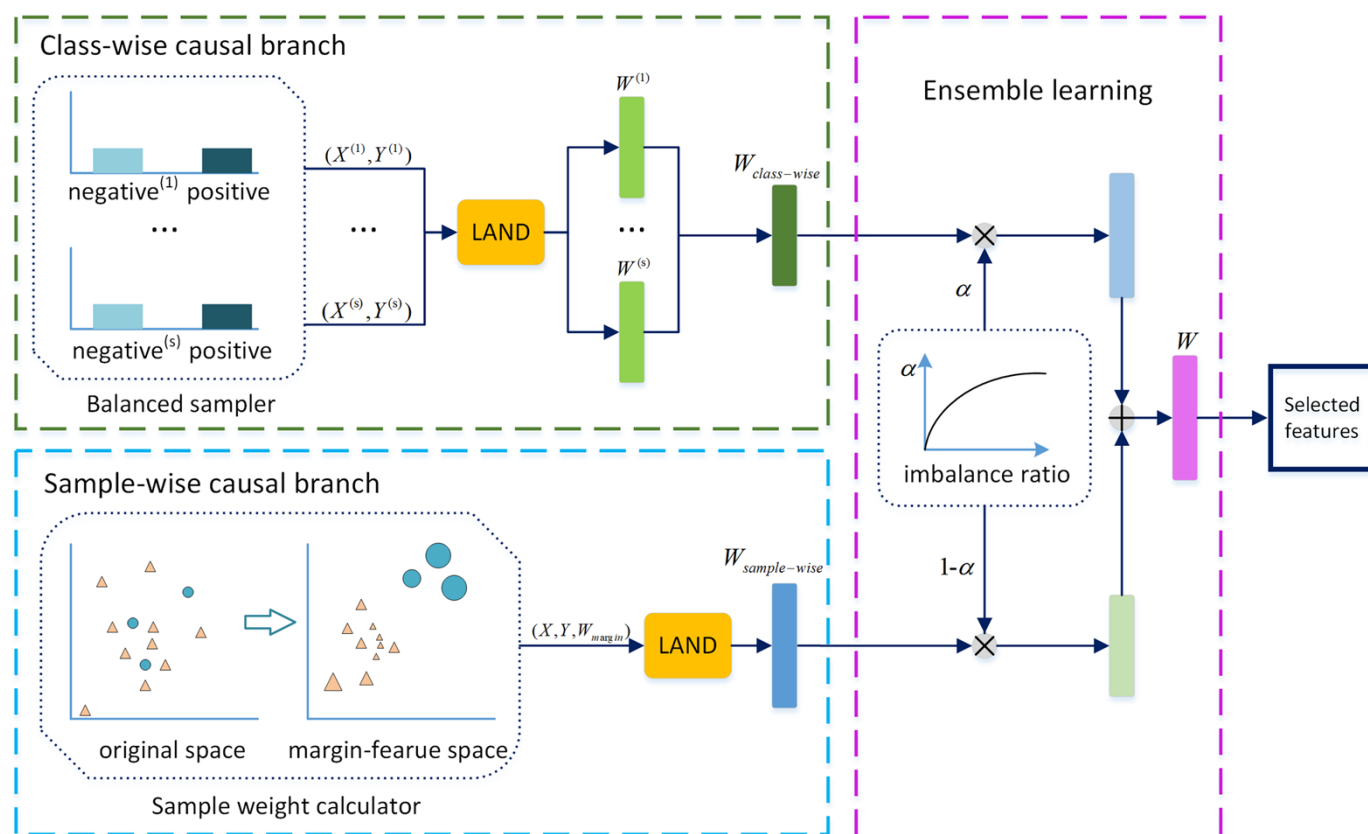

83

84 Figure 1: The framework of CLAND consists of three elements: 1) The class-wise causal branch taking  
 85 re-balanced data as input; 2) The sample-wise causal branch taking the whole data as input; 3) The  
 86 ensemble learning strategy balances the weights of the features generated by the two branches by using the  
 87 super parameter  $\alpha$ .

## 88 2 Related works

89 **Feature selection methods:** The methods can be divided into filter, wrapper, and embedded [11, 12].  
 90 Specifically, embedded methods embed feature selection into the process of model construction. As the  
 91 relationships between biological factors are usually non-linear, we need a feature selection algorithm for  
 92 high-dimensional data to capture the non-linear relationship between input and output. Minimum  
 93 redundancy and maximum relevance (mRMR) [13] is a widely used non-linear feature selection method,  
 94 which uses mutual information as the evaluation measure and selects the most relevant features to the

95 output and is independent of the others. Efficient and robust feature selection (RFS) [14] reduces the  
96 influence of noise data by using  $l_{1,2}$  norm in the loss function and regularization and obtains sparse  
97 feature groups simultaneously. Hilbert–Schmidt Independence Criterion Lasso (HSIC Lasso) [15], which  
98 can find a small number of features from high-dimensional data in a non-linear manner, can be considered  
99 a convex variant of mRMR, a state-of-the-art method of non-linear feature selection. However, these  
100 methods do not consider the imbalance of data sets.

101 **Re-balancing training:** The core idea of the most widely used solution to the imbalance problem can be  
102 said to re-balance the contribution of different classes in the training phase. It can be divided into three  
103 categories: data-level method, algorithm-level method, ensemble method. The data-level method mainly  
104 modifies the number of samples in the dataset to make it suitable for standard learning, including  
105 under-sampling approaches [16, 17], over-sampling approaches [18, 19], and hybrid approaches [20, 21].  
106 The algorithm-level method mainly modifies the existing methods to reduce the tendency of majority  
107 classes. Cost-sensitive learning[22, 23] is the commonly used strategy. The ensemble method combines a  
108 data-level or algorithm-level method with an ensemble learning method to obtain a robust strong classifier.  
109 However, these integration-based methods are sensitive to noise and have poor applicability.

110 **Casual inference:** It has been demonstrated that machine learning methods could improve their  
111 interpretability, transferability, and stability when integrating causal invariance [24]. For example, image  
112 classification and detection task in computer vision: [25] uses causal inference to eliminate prediction bias  
113 caused by momentum in the training process; target detection task: [26] uses causal inference to eliminate  
114 spurious associations between targets and between targets and scenes. In addition to the field of computer  
115 vision, the research of causal inference-assisted machine learning also focuses on learning-to-rank[27, 28]  
116 and recommendation [29, 30], etc, which apply the user's implicit feedback as the label.

### 117 3 Methodology

118 **Symbol definition:** Let  $X = (x_1, \dots, x_n)^T = (u_1, \dots, u_m) \in \mathbb{R}^{n \times m}$  denote the input data with  $n$  samples with  $m$   
119 features, and  $Y = (y_1, \dots, y_n)^T \in \mathbb{R}^n$  denote the output (or labels) in which  $y_i \in Y$  is the label of  $x_i$ . This  
120 paper only considers feature selection for the binary classification problem, in which the class with fewer  
121 samples is minority class also marked as positive class  $P$  and the class with more samples is majority class  
122 also marked as negative class  $N$ , and use imbalance ratio (IR) to quantify the degree of class imbalance of  
123 a dataset as follow:

$$124 \quad P = \{(x_i, y_i) \mid y_i = 1\}, N = \{(x_i, y_i) \mid y_i = 0\}, \text{Imbalance Ratio (IR)} = \frac{\#N}{\#P}.$$

125 The goal of feature selection from biological data is to select  $k$  ( $k \ll m$ ) features most relevant to the label  
126 by exploiting the biological data  $\{(x_i, y_i)\}_{i=1}^n$ .

127 **Evaluation criteria:** In this article, we use the feature selection method to selected the task-related  
128 features from the dataset, but we cannot directly evaluate the effect of the selected features. Therefore, we  
129 evaluate the amount of information retained in the subset feature by evaluating the performance of  
130 different classifiers based on these features.

#### 131 3.1 A Casual view on the class distribution

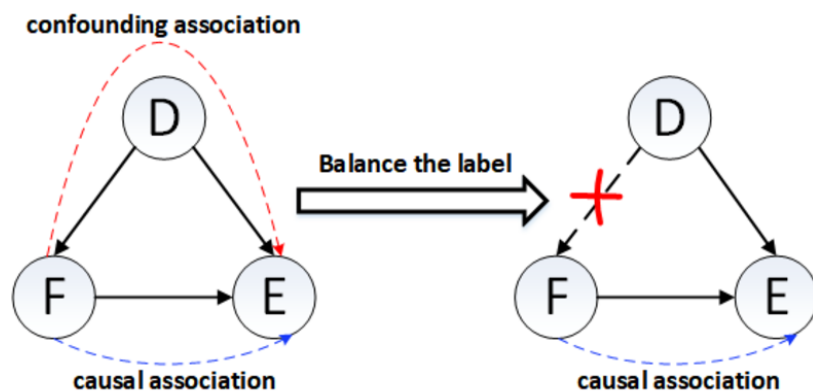

132

133 Figure 2 The proposed causal graph. D: the label probability distribution, F: selected features by a given  
134 feature selection method, E: efficiency of classifiers.

135 To systematically study how imbalanced class distribution affects feature selection, we introduce  
136 confounder [31, 32], the common cause of treatment and outcome, and the main factor leading to spurious  
137 statistical correlation. Deconfounder can ensure the stability of learning to a certain extent. For instance,  
138 considering the relationship between "yellow finger" and "lung cancer," it is not difficult to find that many  
139 people with yellow fingers are more likely to develop lung cancer. Nevertheless, we cannot say that yellow  
140 fingers can cause lung cancer, and obviously, there is no causal relationship between them. As we know  
141 that smokers are prone to lung cancer, and smokers are also prone to yellow fingers, that is, "yellow  
142 finger" $\leftarrow$ smoke $\rightarrow$ "lung cancer." Smoke is the common cause of infection and death and makes a "pseudo  
143 correlation" between infection and death, also called "bias." Therefore, the causality can be obtained only  
144 when the observation data is used correctly, and the influence of confounder (also known as confounder  
145 bias) is removed.

146 Then we constructed a causal diagram [32] in Figure 2 (left), where nodes represent variables and arrows  
147 represent the direct causal effect with three variables: label probability distribution (D); the feature subset  
148 by a given feature selection method (F); the efficiency of classifiers (E). A causal graph is a directed  
149 acyclic graph used to show how the variables interact with each other through causal relationships. D is a  
150 confounder in the diagram, which is the common cause of F (via  $D \rightarrow F$ ) and E (via  $D \rightarrow E$ ).

151  $D \rightarrow F$  indicates that the feature subset is selected from the labeled dataset by the feature selection method.  
152  $D \rightarrow E$ , it is evident that the label probability distribution will affect the efficiency of the classifier.  
153 Therefore, when we evaluate the subset feature's information by the prediction efficiency of classifiers  
154 ( $F \rightarrow E$ ), D is a confounder leading to the confounding association flow from F to E.



155 Let us make some formal explanations and use the Bayes rule to express correlations in Figure 2 (left):

$$156 \quad P(E | F) = \sum_d P(E | F, d) \times P(d | F) \quad (1)$$

157 Where each  $d$  is the stratification of  $D$  and constitutes the whole  $D$ . Confounder  $D$  introduces the bias  
158 through  $P(d|F)$ . To illustrate, suppose  $M$  represents a feature selection method (e.g., mRMR),  $f^*$  represents  
159 the feature set filtered by  $M$ ,  $F=\{f^*,M\}$  represents the overall information. For example,  
160  $P(d=\text{positive-class}|F=\{f^*,M\})$  is small while  $P(d=\text{negative-class}|F=\{f^*,M\})$  is large. According to  
161 Equation 1, the likelihood sum will be attributed to  $P(E|F=\{f^*,M\},d=\text{negative-class})$  more than  
162  $P(E|F=\{f^*,M\},d=\text{positive-class})$ , so the prediction from  $F$  to  $E$  will be focused on negative-class rather than  
163 the  $F$  itself.

164 To eliminate the influence of imbalanced class distribution (confounder), we adjust  $D$  towards balancing  
165 label distribution which means  $D$  and  $F$  is independent. As shown in Figure 2 (right), we balanced the  
166 distribution of the label and eliminate the confounding association. Based on the causal view of the  
167 influence of label distribution on feature selection, we propose a causality inspired feature selection  
168 method called CLAND, which contains three modules and form an efficient and stable feature selection  
169 strategy. Specifically, we designed two branches as shown in Figure 1, the class-wise branch and the  
170 sample-wise branch and used the ensemble strategy to gather the two branches.

### 171 **3.2 Feature selection by LAND**

172 We consider a non-linear extension of LARS [33] leveraging Hibert–Schmidt independence criterion  
173 (HSIC) [34] called Least Angle Non-linear Distributed (LAND) feature selection [35].

174 Specifically, the LAND is a LARS variant of HSIC lasso[15], which can be used to process tens of  
 175 thousands of features and tens of thousands of samples, and has good prediction ability and interpretability.  
 176 The optimization problem of HSIC Lasso for paired data  $\{(x_i, y_i)\}_{i=1}^n$  is formulated as:

$$177 \min_{\beta \in \mathbb{R}^m} \left\| \bar{C} - \sum_{k=1}^m \beta_k \bar{Z}^{(k)} \right\|_{Frob}^2 + \mu \|\beta\|_1, s.t. \beta_1, \dots, \beta_m \geq 0$$

178 Where  $\|\cdot\|_{Frob}$  is the Frobenius norm,  $\|\cdot\|_1$  is the  $l_1$  norm,  $\bar{C} = \Gamma C \Gamma$  and  $\bar{Z}^{(k)} = \Gamma Z^{(k)} \Gamma$  are the centered  
 179 Gram matrices,  $\Gamma = I_n - \frac{1}{n} \mathbf{1}_n \mathbf{1}_n^T$  is the centering matrix,  $I_n$  is n-dimensional identity matrix,  $\mathbf{1}_n$  is the  
 180 n-dimensional vector whose elements is all ones.  $C_{ij} = C(y_i, y_j)$  is the delta kernel function for output,  
 181  $Z_{ij}^{(k)} = Z(x_{ki}, y_{kj})$  is the Gaussian kernel matrix of the k-th feature input, and  $i, j \in \{1, \dots, n\}$ ,  
 182  $\beta = (\beta_1, \dots, \beta_m)^T \in \mathbb{R}^m$  is the regression coefficient vector,  $\mu \geq 0$  is the regularization parameter. LAND  
 183 uses LARS to solve the problem and selects features one by one, and finally gets the most relevant and  
 184 least redundant feature set. To illustrate the reason. The first term of the objective function can be rewritten  
 185 as:

$$186 \min_{\beta \in \mathbb{R}^m} \left\| \bar{C} - \sum_{k=1}^m \beta_k \bar{Z}^{(k)} \right\|_{Frob}^2 = NHSIC(y, y) - 2 \sum_{k=1}^m \beta_k NHSIC(u_k, y) + \sum_{k, l=1}^m \beta_k \beta_l NHSIC(u_k, u_l)$$

187 NHSIC(u,y) is the normalized version of HSIC[34] based on kernel function to estimate the dependency  
 188 between two variables. NHSIC (y,y) is a constant variable and can be ignored in the training process. The  
 189 larger the value  $NHISC(u, y) \in [0, 1]$ , the stronger the dependency between the two variables. If and only  
 190 if  $NHISC(u, y)=0$ , the two variables are independent and when  $u=y$ ,  $NHISC(u, y)=1$ . If the dependency  
 191 between the k-th feature and y is strong, the value of  $NHISC(u_k, y)$  is close to 1 and leads to a large  
 192 value of the regression coefficient  $\beta_k$ , which means the k-th feature should be preferred. If the k-th feature  
 193 is independent of y, the value of  $NHISC(u_k, y)$  is close to zero, and  $\beta_k$  will be very small under the

194 influence of  $l_1$  norm, which means the k-th would not be selected. Moreover, if there is a strong  
195 dependency between k-th and l-th features, which means they are redundant with each other, and the value  
196 of  $NHISC(u_k, u_l)$  is close to one and either of  $\beta_k$  and  $\beta_l$  would be very small, which ensures that features  
197 with the redundant relationship will not be selected at the same time.

198 LAND iteratively selects non-redundant features strongly related to the output and defines the selection  
199 score of the k-th feature as  $w_k = NHISC(u_k, y) - \sum \beta_{k^*} NHISC(u_k, u_{k^*})$ , where  $k^*$  is the feature that has  
200 been selected. Intuitively, this score represents a compromise between the relevance of k-th feature k and  
201 output and the degree of redundancy between k-th feature and previously selected features. At the same  
202 time, due to the use of HSIC [34], which can capture the non-linear relationship between features and  
203 between features and output, the problem of feature-wise non-linear has been solved simultaneously.

### 204 **3.3 Double branch structure and ensemble strategy**

205 This section, we will explain the two-branch structure proposed in framework and ensemble strategy  
206 shown in Figure 1 in detail.

207 As analysis in Section 3.1, the label probability distribution becomes a confounder while the dataset loss  
208 the label balance ( $IR > 1$ ). So for the imbalanced label distribution, we directly adjust it to a balanced  
209 distribution in the training process which forces the causal effect from F to E not influenced by imbalance  
210 distribution, by the class-wise method and the sample-wise method.

211 **Class-wise causal branch:** For confounder D, this branch trans it to several balanced datasets

212  $D' = \{d^{(1)}, \dots, d^{(s)}\}$  by a balanced sampler and the class-wise implementation is defined as:

213 
$$P(E | F) = \frac{1}{s} \sum_{i=1}^s P(E | F, d^{(i)}), s = \sup\{IR\} \quad (2)$$

214 The balanced sampler takes oversampling on the positive class and full sampling on the negative class to  
215 use the information contained in all samples fully. Moreover, noise-based data enhancement is set to  
216 prevent overfitting. By random sampling without putting back, the negative class is divided into  $s = \sup\{IR\}$   
217 sets, and each of them combines with the positive class samples as sub-dataset, and the  $i$ -th sub-dataset is  
218 labeled as  $d^{(i)} = (X^{(i)}, Y^{(i)})$ . LAND is used to calculate each sub-datasets the feature selection score vector  
219 and the  $i$ -th weight vector is labeled as  $W^{(i)} \in \mathbb{R}^m$ . Combine  $s$  weight vector as the branch weight score  
220 by:  $W_{class-wise} = \frac{1}{s} \sum_{i=1}^s W^{(i)} \in \mathbb{R}^m$ .

221 **Sample-wise causal branch:** This branch is sample-wise, builds a reweighted version of observed  
222 distribution by calculating the weight of each sample  $W_X = (w_{x_1}, \dots, w_{x_n})^T \in \mathbb{R}^n$  to eliminate the influence  
223 of confounder and the implementation is defined as:

$$224 \quad P(E | F) = E_{D'}[f_E(F)], D' = \{(x_i, y_i, w_{x_i})\}_{i=1}^n \quad (3)$$

225 where  $D'$  is the dataset with the weight of each sample and  $f_E(\cdot)$  represents the evaluation efficiency of the  
226 classifiers. By assigning more weights for positive samples and less for negative samples, the feature  
227 selection method would more focus on the positive class in the training process and balance the label  
228 distribution on the sample-wise.

229 To evaluate the affect/weight of each sample on the decision of feature selection, we employ the concept of  
230 Margin Vector Feature Space [3] and map the samples in the original feature space to the margin vector  
231 feature space by decomposing the margin of a sample along each dimension. For each sample  
232  $x_i = (x_{i_1}, \dots, x_{i_m}) \in \mathbb{R}^m$  in dataset  $\{(x_i, y_i)\}_{i=1}^n$  is mapping as  $x'_i = (x'_{i_1}, \dots, x'_{i_m}) \in \mathbb{R}^m$ , the  $j$ th component is  
233 formulated as:

---

$$234 \quad x'_{i_j} = \sum_k^K |x_{i_j} - x_{k_j}| - \sum_h^H |x_{i_j} - x_{h_j}|$$

235 where  $x_h$  and  $x_k$  represent the samples with the same and opposite label to  $x_i$  with the amount  $K$  and  $H$ ,  
236 respectively. For the first item in the equation, the value of the positive class with  $K > H$  is larger than the  
237 value of the negative class with  $K < H$  through accumulation operation. And for the second item, the value  
238 of the positive class is less than the negative class. So in the new feature space, the positive class has been  
239 mapping as a group far away from the negative class, and the degree of deviation increases with the  
240 increase of IR.

241 After the margin vector feature space is generated, the samples in the original space are weighted by the  
242 difference of samples in the new space. As the positive class samples always exhibit largely distinct  
243 margin vectors from the negative, we assign weights to a sample according to its deviation with rest of  
244 samples to increase the weight of the positive class. The formulation of the weight of  $(x_i, y_i)$  we  
245 proposed is:

$$246 \quad w_{x_i} = \frac{1}{n-1} \sum_{j=1, j \neq i}^{n-1} dist(x'_i, x'_j) \quad (4)$$

247 where  $dist(x'_i, x'_j)$  is the Euclidean Distance of two samples in the new feature space.

248 Therefore, we use the sample-wise causal branch to eliminate the influence of imbalance, and calculate the  
249 feature score vector  $W_{\text{sample-wise}}$  through LAND. We use this branch as a fine grained supplement to the  
250 class-wise causal branch.

251 **Ensemble learning strategy:** Integrate the score vectors generated by the two branches to eliminate the  
252 influence of confounder from both class-wise and sample-wise. Here, we define a propensity parameter  
253 labeled as  $\alpha$  and calculated by:

$$254 \quad \alpha = -2 \frac{-IR+1}{2} + 1, IR \geq 1 \quad (5)$$

255 Specifically, the  $W_{\text{class-wise}}$  is multiplied by the  $\alpha$ , the  $W_{\text{sample-wise}}$  is multiplied by  $(1-\alpha)$ , and the two new  
256 score vectors are added (Figure 1). Furthermore, the feature set is obtained according to the finally  
257 obtained score vector  $W$ . Although class-wise learning and sample-wise learning are both worthy of  
258 attention, as the imbalance ratio increases, our learning focus should shift to the class-wise branch to  
259 improve the accuracy of positive class recognition. Therefore, we designed a  $\alpha$ -adaptive strategy based on  
260 IR. For different data sets, the larger the IR, the larger the  $\alpha$ .

## 261 **4 Experiment & Analysis**

262 In this section, we will introduce our experimental results on six real biological datasets. We tested the  
263 stability and accuracy of our proposed algorithm to extend to different kinds of classifiers. We also  
264 analyzed the effectiveness of the biomarker found by our algorithm. We evaluated the experimental results  
265 with multiple criteria and proved the power of our proposed method.

### 266 **4.1 Data source and setup detail**

267 To evaluate the efficiency of our method, we download the transcriptomic data of a total of 2028 samples  
268 consisting of 1827 cancer samples and 201 normal samples across six cancer types with different  
269 imbalance ratios (IR) from The Cancer Genome Atlas (TCGA) [36] database. We preprocessed datasets  
270 and deleted pseudogenes and the genes whose average expression values were less than 10. Table 1 lists  
271 the information of each dataset.

Table 1. Description of datasets.

| Dataset                                      | #Genes | #Samples | IR      |
|----------------------------------------------|--------|----------|---------|
| Kidney Chromophobe (KICH)                    | 15608  | 91       | 2.64:1  |
| Colon adenocarcinoma (COAD)                  | 15418  | 311      | 6.59:1  |
| Thyroid carcinoma (THCA)                     | 15362  | 560      | 8.49:1  |
| Head and Neck squamous cell carcinoma (HNSC) | 15909  | 488      | 10.09:1 |
| Esophageal carcinoma (ESCA)                  | 5946   | 175      | 12.46:1 |
| Bladder Urothelial Carcinoma (BLCA)          | 16088  | 403      | 20.21:1 |

273 We compared the performance of our proposed method with ReliefF[37], mRMR[13], MIFS[38],  
274 REFS[14], LAND[35]. As mentioned in Section 3.1, our proposed method is expected to have a stable  
275 performance regardless of the downstream classifier by eliminating the confounders. Therefore, we  
276 introduced six classical classifiers to test the effectiveness and stability of different feature selection  
277 methods, including NB (Naive Bayes), KNN (K-Nearest Neighbors), LR (Logistic Regression), RF  
278 (Random Forest), and GDBT (Gradient Boosting Decision Tree). To better evaluate the models'  
279 performance on imbalanced datasets, we used the confusion matrix as the evaluation index, which can  
280 reflect the number of each class that is correctly or incorrectly identified, including AUCPRC[39],  
281 F1-score[40], G-mean[41], and MCC[42]. Among them, MCC is the most sensitive to the results of  
282 imbalanced datasets.

283 As the number of features in each dataset is much higher than the sample size (shown in Table 1), all the  
 284 samples are used for feature selection, and 80% and 20% of them are used as the training set and test set  
 285 for classifiers, respectively. We use the average result of 10 independent experiments to reduce  
 286 randomness and show the mean and standard deviation in Table 2 and Supplementary A.1. We expect to  
 287 retain as much information as possible with fewer features, so the ten most relevant features were selected  
 288 in each method.

## 289 4.2 CLAND is comparable to the state-of-the-art methods and has better stability

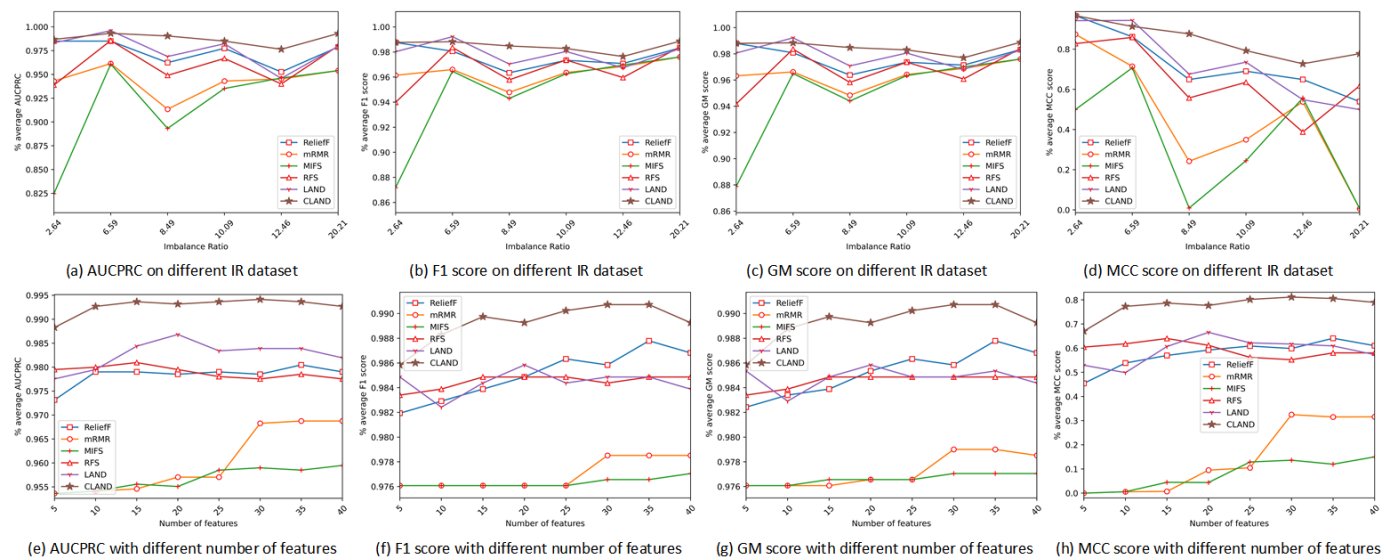

290 (a) AUCPRC on different IR dataset (b) F1 score on different IR dataset (c) GM score on different IR dataset (d) MCC score on different IR dataset  
 291 (e) AUCPRC with different number of features (f) F1 score with different number of features (g) GM score with different number of features (h) MCC score with different number of features

292 Figure 3: AUCPRC, F1-score, GM, MCC of 6 feature selection methods. The horizontal axis denotes the  
 293 IR of the dataset in (a, b, c, d) and the number of selected features in (e, f, g, h). The vertical axis denotes  
 294 the mean value of evaluation metrics.

294 We use five classifiers with four evaluation criteria to assess the performance of feature selection methods  
 295 on six imbalanced datasets with different IR. As shown in Figure 3 (a-d), CLAND is superior to other  
 296 methods in almost all the settings, and the advantages are gradually apparent as the IR of the data set  
 297 increases. The performance of mRMR, MIFS, and RFS in the KICH dataset with the smallest IR is like



298 other methods, but as the IR increases further, their ability to predict the positive class decreases. When the  
 299 IR value reached eight or more, the performance of ReliefF, mRMR, MIFS, and RFS all dropped  
 300 significantly. Moreover, as IR changes, the performance of ReliefF is relatively stable, but it is still lower  
 301 than LAND and CLAND. Table 2 shows the results of THCA, and the detailed results of other datasets are  
 302 shown in Supplementary A.1. LAND is the basis of the CLAND method, and it can obtain a good feature  
 303 set by capturing non-linear relationships between features and labels. However, when it comes to  
 304 imbalanced data, its efficiency in all data sets is still inferior to CLAND, although higher than other  
 305 baselines. With the change of IR, it exhibits noticeable oscillation (Supplementary A.1).

306 Table 2. Detail results of THCA.

| THCA  |        |             |             |              |             |             |             |
|-------|--------|-------------|-------------|--------------|-------------|-------------|-------------|
| Model | Metric | ReliefF     | mRMR        | MIFS         | RFS         | LAND        | CLAND       |
| NB    | AUCPRC | 0.97±0.008  | 0.889±0.025 | 0.892±0.023  | 0.962±0.015 | 0.927±0.035 | 0.993±0.003 |
|       | F1     | 0.943±0.012 | 0.943±0.012 | 0.943±0.012  | 0.943±0.012 | 0.943±0.012 | 0.969±0.014 |
|       | GM     | 0.944±0.011 | 0.944±0.011 | 0.944±0.011  | 0.944±0.011 | 0.944±0.011 | 0.969±0.013 |
|       | MCC    | 0.479±0.048 | -0.093±0.15 | -0.044±0.125 | 0.462±0.042 | 0.269±0.172 | 0.795±0.066 |
| KNN   | AUCPRC | 0.96±0.014  | 0.917±0.016 | 0.895±0.021  | 0.943±0.022 | 0.993±0.007 | 0.989±0.005 |
|       | F1     | 0.959±0.012 | 0.95±0.01   | 0.943±0.012  | 0.96±0.012  | 0.989±0.005 | 0.985±0.005 |
|       | GM     | 0.959±0.012 | 0.951±0.009 | 0.944±0.011  | 0.96±0.012  | 0.989±0.005 | 0.985±0.005 |
|       | MCC    | 0.635±0.084 | 0.384±0.1   | 0.051±0.088  | 0.581±0.087 | 0.905±0.039 | 0.868±0.032 |
| LR    | AUCPRC | 0.938±0.019 | 0.891±0.021 | 0.892±0.021  | 0.917±0.022 | 0.944±0.027 | 0.992±0.007 |
|       | F1     | 0.956±0.008 | 0.943±0.012 | 0.943±0.012  | 0.946±0.011 | 0.943±0.012 | 0.988±0.004 |

|      |        |             |              |             |             |             |             |
|------|--------|-------------|--------------|-------------|-------------|-------------|-------------|
|      | GM     | 0.957±0.008 | 0.944±0.011  | 0.944±0.011 | 0.947±0.011 | 0.944±0.011 | 0.988±0.004 |
|      | MCC    | 0.524±0.103 | -0.021±0.018 | -0.01±0.016 | 0.334±0.082 | 0.41±0.116  | 0.891±0.046 |
| RF   | AUCPRC | 0.97±0.006  | 0.938±0.022  | 0.893±0.02  | 0.966±0.013 | 0.991±0.01  | 0.989±0.009 |
|      | F1     | 0.977±0.005 | 0.954±0.01   | 0.943±0.012 | 0.972±0.01  | 0.989±0.007 | 0.991±0.005 |
|      | GM     | 0.977±0.005 | 0.954±0.009  | 0.944±0.011 | 0.972±0.01  | 0.989±0.007 | 0.991±0.005 |
|      | MCC    | 0.778±0.04  | 0.502±0.129  | 0.013±0.083 | 0.73±0.094  | 0.904±0.058 | 0.912±0.059 |
| GDBT | AUCPRC | 0.974±0.007 | 0.932±0.021  | 0.894±0.022 | 0.957±0.019 | 0.989±0.008 | 0.989±0.006 |
|      | F1     | 0.982±0.007 | 0.949±0.01   | 0.943±0.012 | 0.968±0.012 | 0.988±0.006 | 0.991±0.005 |
|      | GM     | 0.982±0.007 | 0.949±0.01   | 0.944±0.011 | 0.968±0.012 | 0.988±0.006 | 0.991±0.005 |
|      | MCC    | 0.828±0.047 | 0.439±0.104  | 0.036±0.071 | 0.679±0.114 | 0.89±0.055  | 0.915±0.039 |

307 Figure 3 (a-d) shows CLAND outperforms the traditional feature selection methods in terms of stability.  
 308 AUCPRC, F1-score, and GM of CLAND all maintained high levels with the increase of IR. Besides, we  
 309 also evaluate the performance of different selected features numbers on the BLCA dataset and find the  
 310 performance of CLAND is stable and significantly higher than other methods, shown in Figure 3 (e-h). In  
 311 contrast, MIFS is most sensitive to IR changes and most unstable. Moreover, when IR or the number of  
 312 selected feature changes, CLAND is the least affected, which shows that our proposed method can stably  
 313 obtain adequate information. Throughout the four evaluation criteria, CLAND showed the best accuracy  
 314 and showed the best stability.

### 315 **4.3 Biological significance of biomarker discovered by CLAND**

316 Table 3 lists the top ten cancer genes obtained by CLAND for each cancer type. The genes are ranked by  
 317 importance from high to low for distinguishing between cancer and normal samples. The completed results

318 of all datasets are shown in Supplementary A.1. Besides classification performance and stability, we also  
319 consider the biological function of selected cancer genes. Take several genes in the table as illustrations.  
320 The gene with the highest score in KICH is *UMOD*, its *variants* are associated with chronic kidney disease  
321 in several studies [43], and its expression value is significantly down-regulated in renal cell carcinoma [44].  
322 Because of the abundant expression in the colon but absence in colonic adenomas and adenocarcinomas,  
323 the *SLC26A3* is considered a potential tumor suppressor gene [45, 46]. The gene with the highest score in THCA  
324 is *TFF3*, which has been proved to be an oncogene in various types of cancers, such as breast, gastric and  
325 colorectal cancers [47, 48]. *TFF3* is a gene crucial in the signaling transduction pathway MAPK/ERK,  
326 which plays an essential role in tumor progression and metastasis, and can be used as a clinical therapeutic  
327 target for thyroid cancer [49]. *PER1*, with the highest score in BLCA, is a core in the generation of  
328 circadian rhythms, an essential regulator of cell division. The over-expression of *PER1* makes cancer cells  
329 sensitive to DNA damage-induced apoptosis, while the expression level of *PER1* in cancer patients is  
330 usually low [50]. Some other studies have shown that it plays a vital role in tumor occurrence, invasion,  
331 and prognosis[51].

332 Table 3. Biomarkers of cancers selected by CLAND

| <b>Dataset</b> | <b>Top 10 features</b>                                                           |
|----------------|----------------------------------------------------------------------------------|
| KICH           | <i>UMOD, NEK11, DZIP1, CCDC30, CHRDL1, DNAL1, FLRT3, GABRP, HS3ST3B1, TMEM33</i> |
| COAD           | <i>SLC26A3, LPAR1, GLTP, GLP2R, METTL7A, IL6R, CFBF, SCARA5, ABCA8, TRAK2</i>    |
| THCA           | <i>TFF3, ATP2C2, IGF2BP2, COL23A1, AGPAT4, PAPSS2, PRPS1, BMP1, CCND1, DLG4</i>  |

|      |                                                                                         |
|------|-----------------------------------------------------------------------------------------|
| HNSC | <i>CAB39L, QARS, GLT25D1, KRT13, ATP6V1C1, C20orf20, ARHGEF10L, CDCA5, APPL1, PRIM2</i> |
| ESCA | <i>LY6E, MRPL13, CENPW, C5orf22, XPOT, UTP18, KIF22, ENOPH1, PDAP1, PTPN12</i>          |
| BLCA | <i>PER1, SMPD4, TPPP3, BCL2, LGI4, FXYD1, ARHGAP39, CYP20A1, EIF2AK1, C16orf5</i>       |

## 333 **Conclusion**

334 This study describes how the class-imbalance problem affects the exploration of reliable biomarkers from  
335 cancer high-dimensional and non-linear omics data. By introducing the causal mechanism, we elucidate  
336 that class-imbalance reduces the stability of feature selection methods by simultaneously affecting the  
337 selected features and class prediction. Moreover, we propose a new feature selection method inspired by  
338 causality theory and technique called CLAND. We believe that the feature selection method should  
339 consider all the difficulties of biological datasets to obtain more valuable biomarkers. Therefore, the  
340 framework of CLAND is a dual-branch structure, including a class-wise causal branch and a sample-wise  
341 causal branch to eliminate the impact of imbalanced distribution. By conducting experiments on six  
342 representative real cancer data sets, CLAND has been proven to have better performance, better stability,  
343 broader applicability than state-of-the-art methods, and can find biomarkers with solid biological  
344 significance. In general, we provide a novel paradigm for feature selection from a causal perspective.

## 345 **Acknowledgments**

346 The authors thank funding support from the National Natural Science Foundation of China (61902144,  
347 U19A2065, 61976102).

## 348 **Author Contribution**

349 YL conceived and designed the model and performed the experiments. YL and QH analyzed the result. YL  
350 and HS wrote the paper. YC and HS carried out revision of the manuscript.

## 351 **References List**

- 352 1. Pan, S., et al., *High throughput proteome screening for biomarker detection*. Molecular & Cellular  
353 Proteomics, 2005. **4**(2): p. 182-190.
- 354 2. Ali, A., S.M. Shamsuddin, and A.L. Ralescu, *Classification with class imbalance problem*. Int. J.  
355 Advance Soft Compu. Appl, 2013. **5**(3).
- 356 3. Yu, L., Y. Han, and M.E. Berens, *Stable gene selection from microarray data via sample*  
357 *weighting*. IEEE/ACM Transactions on Computational Biology and Bioinformatics, 2011. **9**(1): p.  
358 262-272.
- 359 4. Japkowicz, N. *The class imbalance problem: Significance and strategies*. in *Proc. of the Int'l Conf.*  
360 *on Artificial Intelligence*. 2000. Citeseer.
- 361 5. Ling, C.X. and V.S. Sheng, *Cost-sensitive learning and the class imbalance problem*. Encyclopedia  
362 of machine learning, 2008. **2011**: p. 231-235.
- 363 6. Hicks, J., *Causality in economics*. 1980: Australian National University Press.

- 364 7. Vandembroucke, J.P., A. Broadbent, and N. Pearce, *Causality and causal inference in*  
365 *epidemiology: the need for a pluralistic approach*. International journal of epidemiology, 2016.  
366 **45**(6): p. 1776-1786.
- 367 8. Hernán, M.A. and J.M. Robins, *Causal inference*. 2010, CRC Boca Raton, FL.
- 368 9. Pearl, J., *Causal inference in statistics: An overview*. Statistics surveys, 2009. **3**: p. 96-146.
- 369 10. Morgan, S.L. and C. Winship, *Counterfactuals and causal inference*. 2015: Cambridge University  
370 Press.
- 371 11. Chandrashekar, G. and F. Sahin, *A survey on feature selection methods*. Computers & Electrical  
372 Engineering, 2014. **40**(1): p. 16-28.
- 373 12. Miao, J. and L. Niu, *A survey on feature selection*. Procedia Computer Science, 2016. **91**: p.  
374 919-926.
- 375 13. Peng, H., F. Long, and C. Ding, *Feature selection based on mutual information criteria of*  
376 *max-dependency, max-relevance, and min-redundancy*. IEEE Transactions on pattern analysis and  
377 machine intelligence, 2005. **27**(8): p. 1226-1238.
- 378 14. Nie, F., et al., *Efficient and robust feature selection via joint  $\ell_2, 1$ -norms minimization*. Advances  
379 in neural information processing systems, 2010. **23**: p. 1813-1821.
- 380 15. Yamada, M., et al., *High-dimensional feature selection by feature-wise kernelized lasso*. Neural  
381 computation, 2014. **26**(1): p. 185-207.
- 382 16. Kubat, M. and S. Matwin. *Addressing the curse of imbalanced training sets: one-sided selection*. in  
383 *Icml*. 1997. Citeseer.

- 384 17. Yen, S.-J. and Y.-S. Lee, *Cluster-based under-sampling approaches for imbalanced data*  
385 *distributions*. Expert Systems with Applications, 2009. **36**(3): p. 5718-5727.
- 386 18. Zheng, Z., Y. Cai, and Y. Li, *Oversampling method for imbalanced classification*. Computing and  
387 Informatics, 2015. **34**(5): p. 1017-1037.
- 388 19. Sáez, J.A., B. Krawczyk, and M. Woźniak, *Analyzing the oversampling of different classes and*  
389 *types of examples in multi-class imbalanced datasets*. Pattern Recognition, 2016. **57**: p. 164-178.
- 390 20. Batista, G.E., A.L. Bazzan, and M.C. Monard. *Balancing Training Data for Automated Annotation*  
391 *of Keywords: a Case Study*. in *WOB*. 2003.
- 392 21. Batista, G.E., R.C. Prati, and M.C. Monard, *A study of the behavior of several methods for*  
393 *balancing machine learning training data*. ACM SIGKDD explorations newsletter, 2004. **6**(1): p.  
394 20-29.
- 395 22. Lomax, S. and S. Vadera, *A survey of cost-sensitive decision tree induction algorithms*. ACM  
396 Computing Surveys (CSUR), 2013. **45**(2): p. 1-35.
- 397 23. Elkan, C. *The foundations of cost-sensitive learning*. in *International joint conference on artificial*  
398 *intelligence*. 2001. Lawrence Erlbaum Associates Ltd.
- 399 24. Guo, R., et al., *A survey of learning causality with data: Problems and methods*. ACM Computing  
400 Surveys (CSUR), 2020. **53**(4): p. 1-37.
- 401 25. Tang, K., J. Huang, and H. Zhang, *Long-tailed classification by keeping the good and removing the*  
402 *bad momentum causal effect*. arXiv preprint arXiv:2009.12991, 2020.

- 403 26. Wang, T., et al. *Visual commonsense r-cnn*. in *Proceedings of the IEEE/CVF Conference on*  
404 *Computer Vision and Pattern Recognition*. 2020.
- 405 27. Joachims, T., A. Swaminathan, and T. Schnabel. *Unbiased learning-to-rank with biased feedback*.  
406 in *Proceedings of the Tenth ACM International Conference on Web Search and Data Mining*. 2017.
- 407 28. Joachims, T. and A. Swaminathan. *Counterfactual evaluation and learning for search,*  
408 *recommendation and ad placement*. in *Proceedings of the 39th International ACM SIGIR*  
409 *conference on Research and Development in Information Retrieval*. 2016.
- 410 29. Liang, D., L. Charlin, and D.M. Blei. *Causal inference for recommendation*. in *Causation:*  
411 *Foundation to Application, Workshop at UAI. AUAI*. 2016.
- 412 30. Wang, Y., et al., *The deconfounded recommender: A causal inference approach to*  
413 *recommendation*. arXiv preprint arXiv:1808.06581, 2018.
- 414 31. Pearl, J. and D. Mackenzie, *The book of why: the new science of cause and effect*. 2018: Basic  
415 books.
- 416 32. Pearl, J., *Causality*. 2009: Cambridge university press.
- 417 33. Efron, B., et al., *Least angle regression*. *Annals of statistics*, 2004. **32**(2): p. 407-499.
- 418 34. Gretton, A., et al. *Measuring statistical dependence with Hilbert-Schmidt norms*. in *International*  
419 *conference on algorithmic learning theory*. 2005. Springer.
- 420 35. Yamada, M., et al., *Ultra high-dimensional nonlinear feature selection for big biological data*.  
421 *IEEE Transactions on Knowledge and Data Engineering*, 2018. **30**(7): p. 1352-1365.



- 
- 422 36. Tomczak, K., P. Czerwińska, and M. Wiznerowicz, *The Cancer Genome Atlas (TCGA): an*  
423 *immeasurable source of knowledge*. Contemporary oncology, 2015. **19**(1A): p. A68.
- 424 37. Robnik-Šikonja, M. and I. Kononenko, *Theoretical and empirical analysis of ReliefF and RReliefF*.  
425 Machine learning, 2003. **53**(1): p. 23-69.
- 426 38. Battiti, R., *Using mutual information for selecting features in supervised neural net learning*. IEEE  
427 Transactions on neural networks, 1994. **5**(4): p. 537-550.
- 428 39. Davis, J. and M. Goadrich. *The relationship between Precision-Recall and ROC curves*. in  
429 *Proceedings of the 23rd international conference on Machine learning*. 2006.
- 430 40. Powers, D.M., *Evaluation: from precision, recall and F-measure to ROC, informedness,*  
431 *markedness and correlation*. arXiv preprint arXiv:2010.16061, 2020.
- 432 41. Sokolova, M., N. Japkowicz, and S. Szpakowicz. *Beyond accuracy, F-score and ROC: a family of*  
433 *discriminant measures for performance evaluation*. in *Australasian joint conference on artificial*  
434 *intelligence*. 2006. Springer.
- 435 42. Boughorbel, S., F. Jarray, and M. El-Anbari, *Optimal classifier for imbalanced data using*  
436 *Matthews Correlation Coefficient metric*. PloS one, 2017. **12**(6): p. e0177678.
- 437 43. Gudbjartsson, D.F., et al., *Association of variants at UMOD with chronic kidney disease and kidney*  
438 *stones—role of age and comorbid diseases*. PLoS genetics, 2010. **6**(7): p. e1001039.
- 439 44. Eikrem, O.S., et al., *Development and confirmation of potential gene classifiers of human clear cell*  
440 *renal cell carcinoma using next-generation RNA sequencing*. Scandinavian journal of urology,  
441 2016. **50**(6): p. 452-462.

- 442 45. Wedenoja, S., et al., *Update on SLC26A3 mutations in congenital chloride diarrhea*. Human  
443 mutation, 2011. **32**(7): p. 715-722.
- 444 46. Schweinfest, C.W., et al., *slc26a3 (dra)-deficient mice display chloride-losing diarrhea, enhanced  
445 colonic proliferation, and distinct up-regulation of ion transporters in the colon*. Journal of  
446 Biological Chemistry, 2006. **281**(49): p. 37962-37971.
- 447 47. May, F.E. and B.R. Westley, *TFF3 is a valuable predictive biomarker of endocrine response in  
448 metastatic breast cancer*. Endocrine-related cancer, 2015. **22**(3): p. 465.
- 449 48. Xiao, L., et al., *Serum TFF3 may be a pharmacodynamic marker of responses to chemotherapy in  
450 gastrointestinal cancers*. BMC clinical pathology, 2014. **14**(1): p. 1-10.
- 451 49. Lin, X., et al., *TFF3 Contributes to Epithelial-Mesenchymal Transition (EMT) in papillary thyroid  
452 carcinoma cells via the MAPK/ERK signaling pathway*. Journal of Cancer, 2018. **9**(23): p. 4430.
- 453 50. Gery, S., et al., *The circadian gene per1 plays an important role in cell growth and DNA damage  
454 control in human cancer cells*. Molecular cell, 2006. **22**(3): p. 375-382.
- 455 51. Zhao, H., et al., *Prognostic relevance of Period1 (Per1) and Period2 (Per2) expression in human  
456 gastric cancer*. International journal of clinical and experimental pathology, 2014. **7**(2): p. 619.

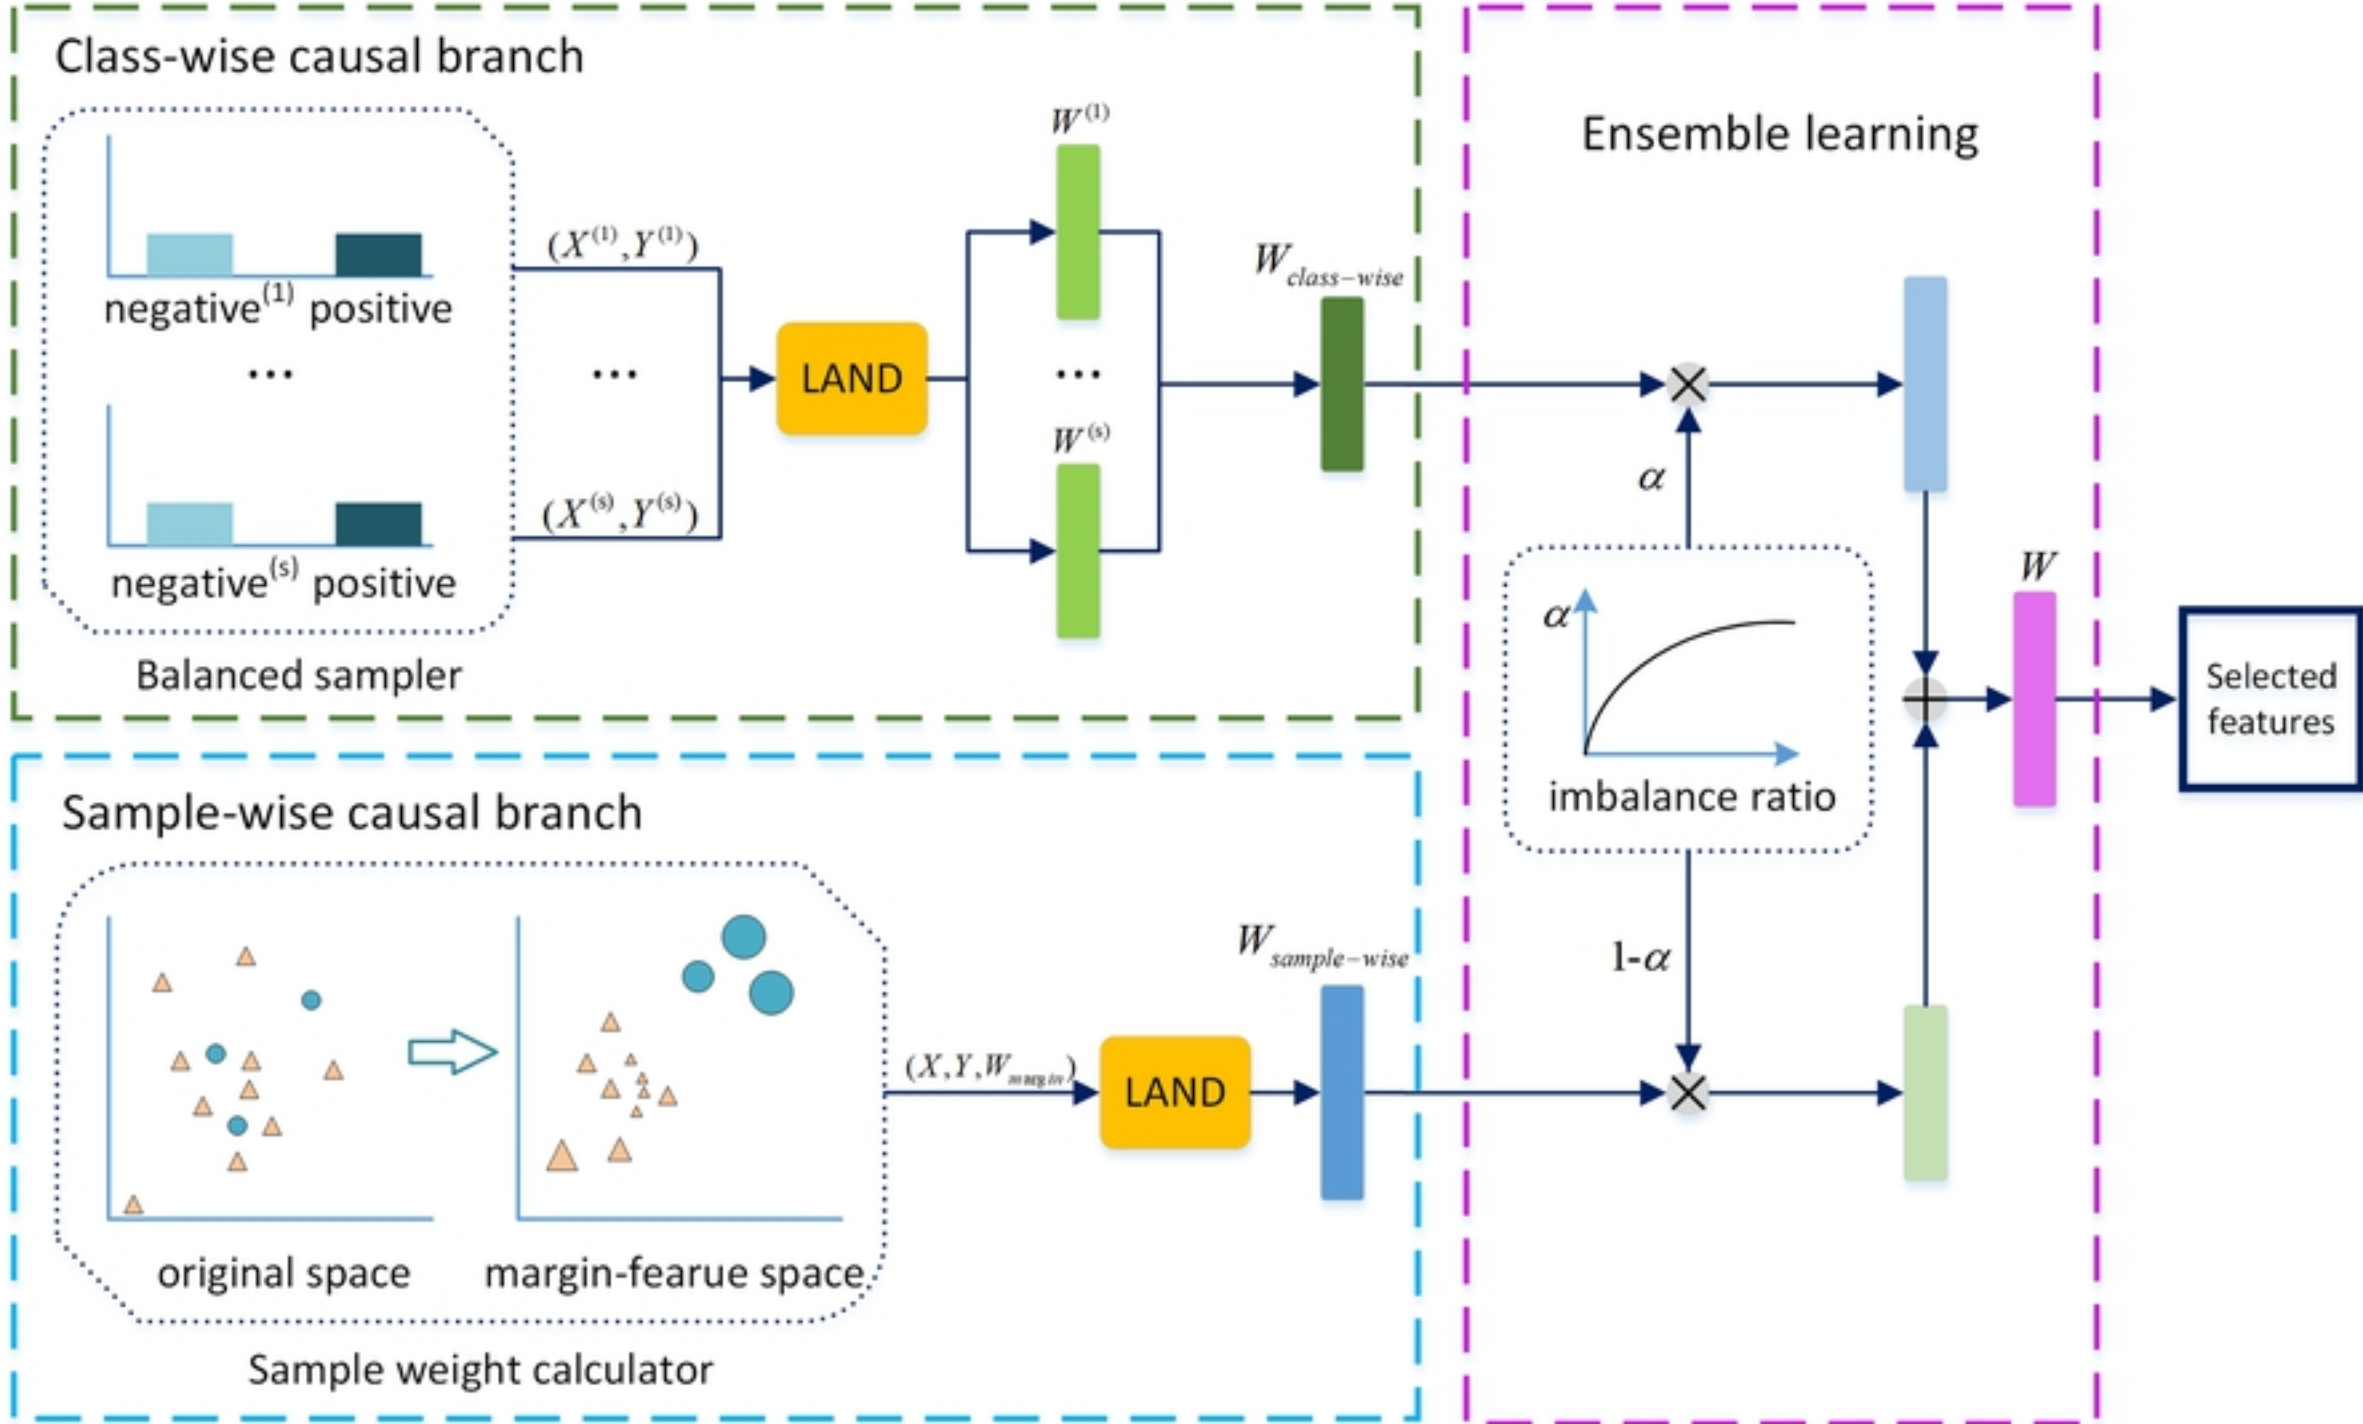

Figure 1

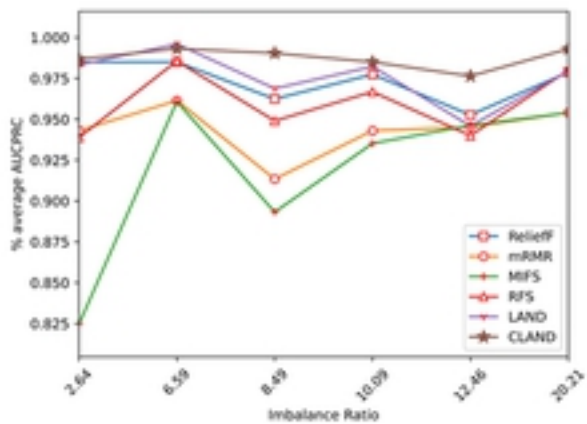

(a) AUCPRC on different IR dataset

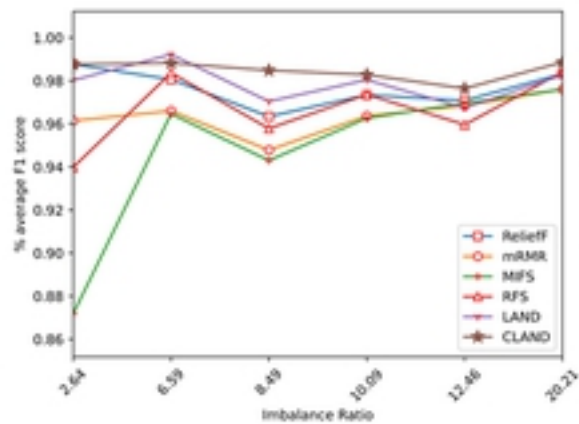

(b) F1 score on different IR dataset

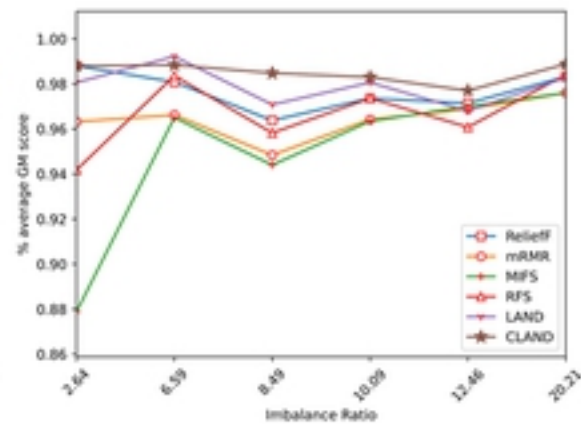

(c) GM score on different IR dataset

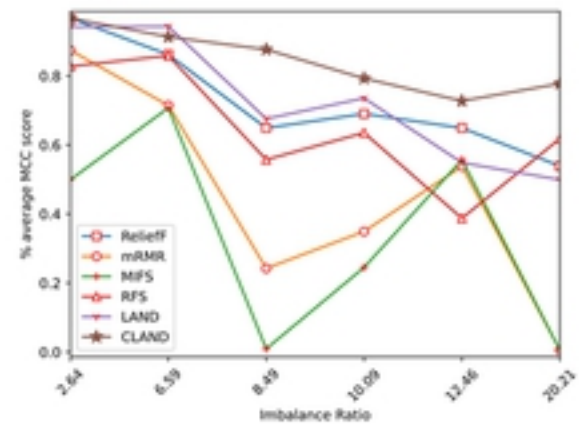

(d) MCC score on different IR dataset

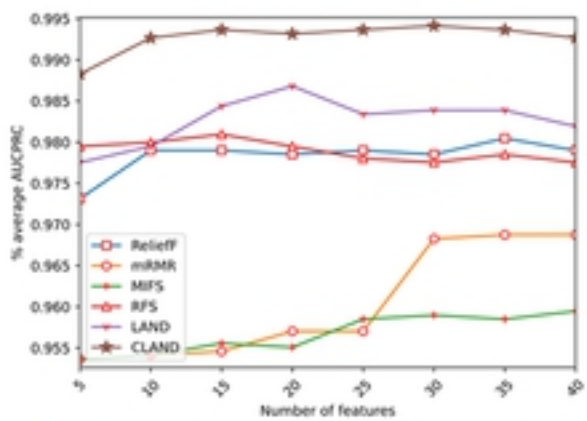

(e) AUCPRC with different number of features

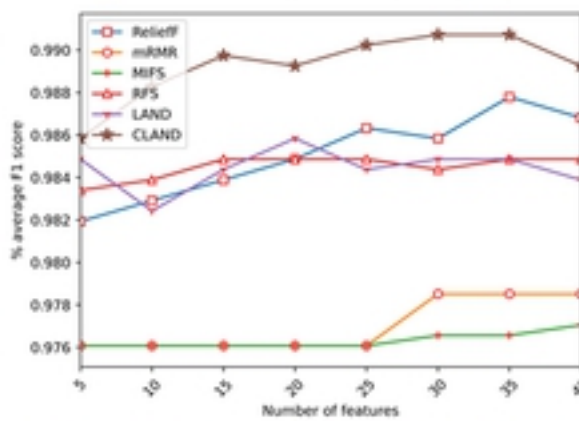

(f) F1 score with different number of features

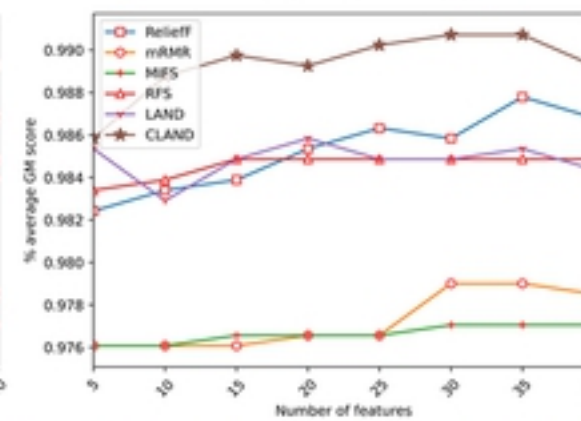

(g) GM score with different number of features

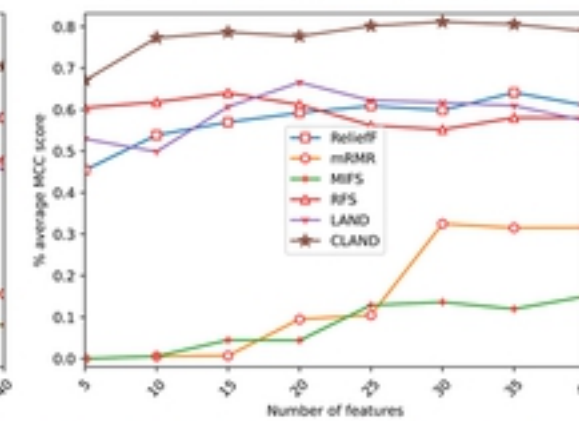

(h) MCC score with different number of features

Figure 3

**confounding association**

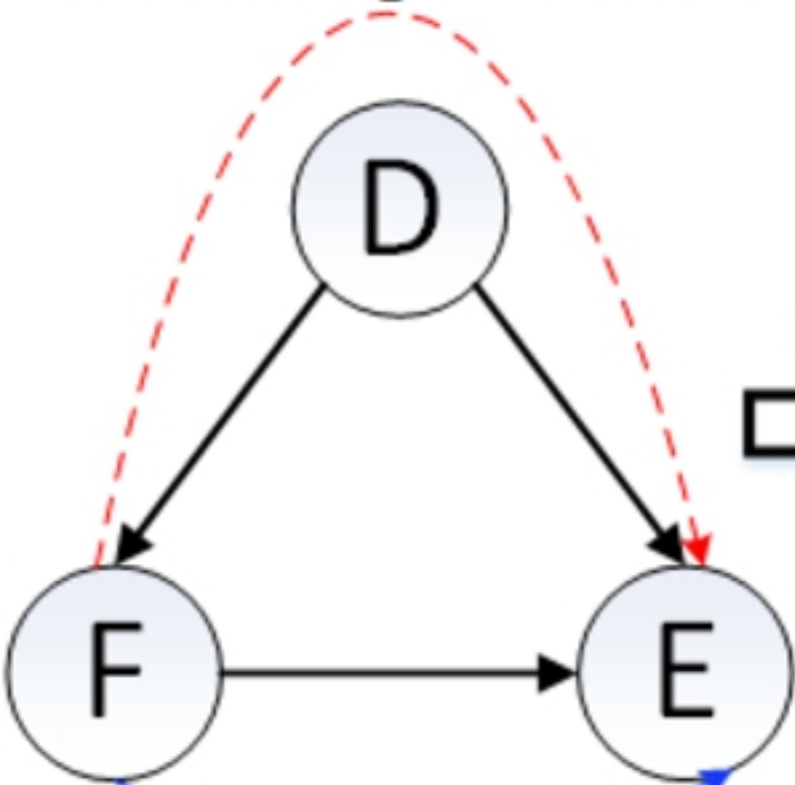

**Balance the label**

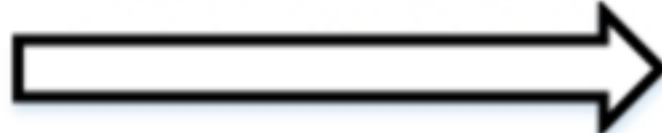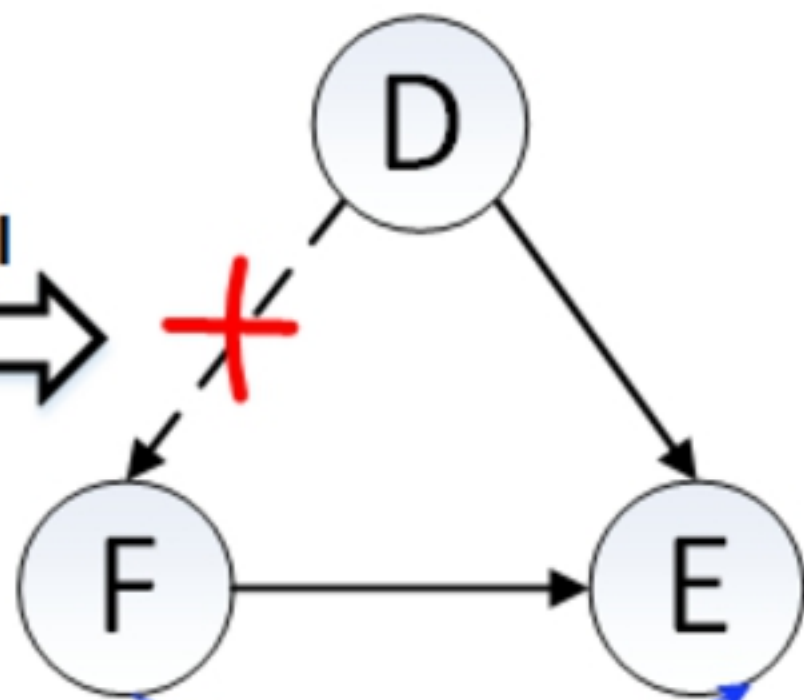

**causal association**

Figure 2
